# Supplementary material for: Resection is responsible for loss of transcription around a double-strand break in Saccharomyces cerevisiae
Source: eLife. 2015 Jul 31;4:e08942. doi: 10.7554/eLife.08942 (PMC4541074; doi:10.7554/eLife.08942)
Supplement: Figure 1—source data 1. — DOI: http://dx.doi.org/10.7554/eLife.08942.004 [file elife08942s001.xls]

## Sheet: Foglio1
Chr	Type	Start	Stop	Strand	ID	Alias	WT_1_T0 densities	WT_2_T0 densities	WT_1_T60 densities	WT_2_T60 densities	WT_1_T240 densities	WT_2_T240 densities
MATa	gene	1	1499	+	YCR033W	SNT1	0.793754	0.593143	0.841021	0.705785	0.335023	0.322948
MATa	gene	1922	2965	+	YCR034W	ELO2	8.83485	8.3993	6.46642	7.80973	2.28516	2.56073
MATa	gene	3164	4348	-	YCR035C	RRP43	0.886149	0.862104	0.798882	0.795905	0.219295	0.202297
MATa	gene	4627	5628	+	YCR036W	RBK1	2.15987	1.65493	1.76175	1.49449	0.532072	0.46997
MATa	gene	5744	8515	-	YCR037C	PHO87	1.12491	0.839406	0.891776	1.04786	0.119415	0.125942
MATa	gene	8951	10879	-	YCR038C	BUD5	0.431447	0.289643	0.323573	0.240155	0.0392919	0.0301633
MATa	gene	10878	11237	-	YCR096C	HMRA2	3.09257	1.97842	1.98456	1.68058	0.293609	0.239205
MATa	gene	11534	12020	+	YCR097W	HMRA1	4.28041	2.70256	2.01677	1.43582	0.267861	0.227802
MATa	gene	12401	16624	-	YCR042C	TAF2	0.624365	0.589048	0.480749	0.485936	0.0477277	0.0549157
MATa	gene	17488	17871	-	YCR043C	YCR043C	3.24086	2.89174	2.401	2.42106	0.463239	0.567708
MATa	gene	18104	19177	-	YCR044C	PER1	1.83698	1.4025	1.89867	1.92518	0.411428	0.421128
MATa	gene	21141	21650	-	YCR046C	IMG1	0.927695	0.739521	1.10436	1.17076	0.379122	0.435056
MATa	gene	21945	22404	-	YCR047C	BUD23	0.719632	0.513287	0.479694	0.587036	0.206242	0.256351
					Figure 1B		Average				StDev
					ID		T0	T60	T240		T0	T60	T240
					YCR033W	SNT1	0.693449	0.773403	0.328986		0.141853	0.0956259	0.00853839
					YCR034W	ELO2	8.61708	7.13807	2.42295		0.307977	0.949862	0.194861
					YCR035C	RRP43	0.874126	0.797393	0.210796		0.0170019	0.00210488	0.0120196
					YCR036W	RBK1	1.9074	1.62812	0.501021		0.357049	0.188986	0.0439123
					YCR037C	PHO87	0.982157	0.969819	0.122678		0.201881	0.110369	0.00461488
					YCR038C	BUD5	0.360545	0.281864	0.0347276		0.100271	0.0589857	0.00645487
					YCR096C	HMRA2	2.5355	1.83257	0.266407		0.787821	0.214949	0.0384692
					YCR097W	HMRA1	3.49149	1.72629	0.247831		1.1157	0.410793	0.0283261
					YCR042C	TAF2	0.606706	0.483342	0.0513217		0.0249729	0.00366773	0.00508274
					YCR043C	YCR043C	3.0663	2.41103	0.515473		0.246863	0.014178	0.0738703
					YCR044C	PER1	1.61974	1.91192	0.416278		0.307221	0.0187435	0.0068587
					YCR046C	IMG1	0.833608	1.13756	0.407089		0.133059	0.0469571	0.0395518
					YCR047C	BUD23	0.61646	0.533365	0.231297		0.145908	0.0759018	0.0354325
					ID	Alias	WT_1_T0 densities	WT_2_T0 densities	WT_1_T60 densities	WT_2_T60 densities	WT_1_T240 densities	WT_2_T240 densities
					YCR033W	SNT1	1	1	1.05955	1.18991	0.422074	0.544469
					YCR034W	ELO2	1	1	0.731922	0.929807	0.258653	0.304875
					YCR035C	RRP43	1	1	0.901521	0.923212	0.24747	0.234655
					YCR036W	RBK1	1	1	0.815674	0.903051	0.246344	0.283982
					YCR037C	PHO87	1	1	0.792753	1.24834	0.106155	0.150036
					YCR038C	BUD5	1	1	0.749972	0.829142	0.0910699	0.10414
					YCR096C	HMRA2	1	1	0.641719	0.849453	0.09494	0.120907
					YCR097W	HMRA1	1	1	0.471163	0.53128	0.0625783	0.0842909
					YCR042C	TAF2	1	1	0.769981	0.824952	0.076442	0.093228
					YCR043C	YCR043C	1	1	0.740855	0.837232	0.142937	0.19632
					YCR044C	PER1	1	1	1.03358	1.37267	0.22397	0.300269
					YCR046C	IMG1	1	1	1.19043	1.58314	0.408671	0.588295
					YCR047C	BUD23	1	1	0.666582	1.14368	0.286594	0.499431
					Figure 1C		Average				StDev
					ID		T0	T60	T240		T0	T60	T240
					YCR033W	SNT1	1	1.12473	0.483272		0	0.0921779	0.0865462
					YCR034W	ELO2	1	0.830864	0.281764		0	0.139926	0.0326836
					YCR035C	RRP43	1	0.912367	0.241063		0	0.0153377	0.00906171
					YCR036W	RBK1	1	0.859362	0.265163		0	0.0617851	0.0266142
					YCR037C	PHO87	1	1.02055	0.128096		0	0.322146	0.0310287
					YCR038C	BUD5	1	0.789557	0.0976048		0	0.055982	0.00924173
					YCR096C	HMRA2	1	0.745586	0.107923		0	0.14689	0.0183614
					YCR097W	HMRA1	1	0.501221	0.0734346		0	0.0425094	0.0153531
					YCR042C	TAF2	1	0.797466	0.084835		0	0.0388702	0.0118695
					YCR043C	YCR043C	1	0.789043	0.169629		0	0.0681485	0.0377476
					YCR044C	PER1	1	1.20313	0.26212		0	0.239773	0.0539515
					YCR046C	IMG1	1	1.38678	0.498483		0	0.277685	0.127013
					YCR047C	BUD23	1	0.905131	0.393012		0	0.337358	0.150498
